# Supplementary material for: Transcriptomic Analysis of the Brown Planthopper, Nilaparvata lugens, at Different Stages after Metarhizium anisopliae Challenge
Source: PubMed Central journal article supplement (PMC7073985; doi:10.3390/insects11020139), 2020-02-24
Supplement: insects-11-00139-s001.pdf [file insects-11-00139-s001.pdf]

Supplementary Figure 1. Matches of *N. lugens* transcriptome unigenes with respect to other species.

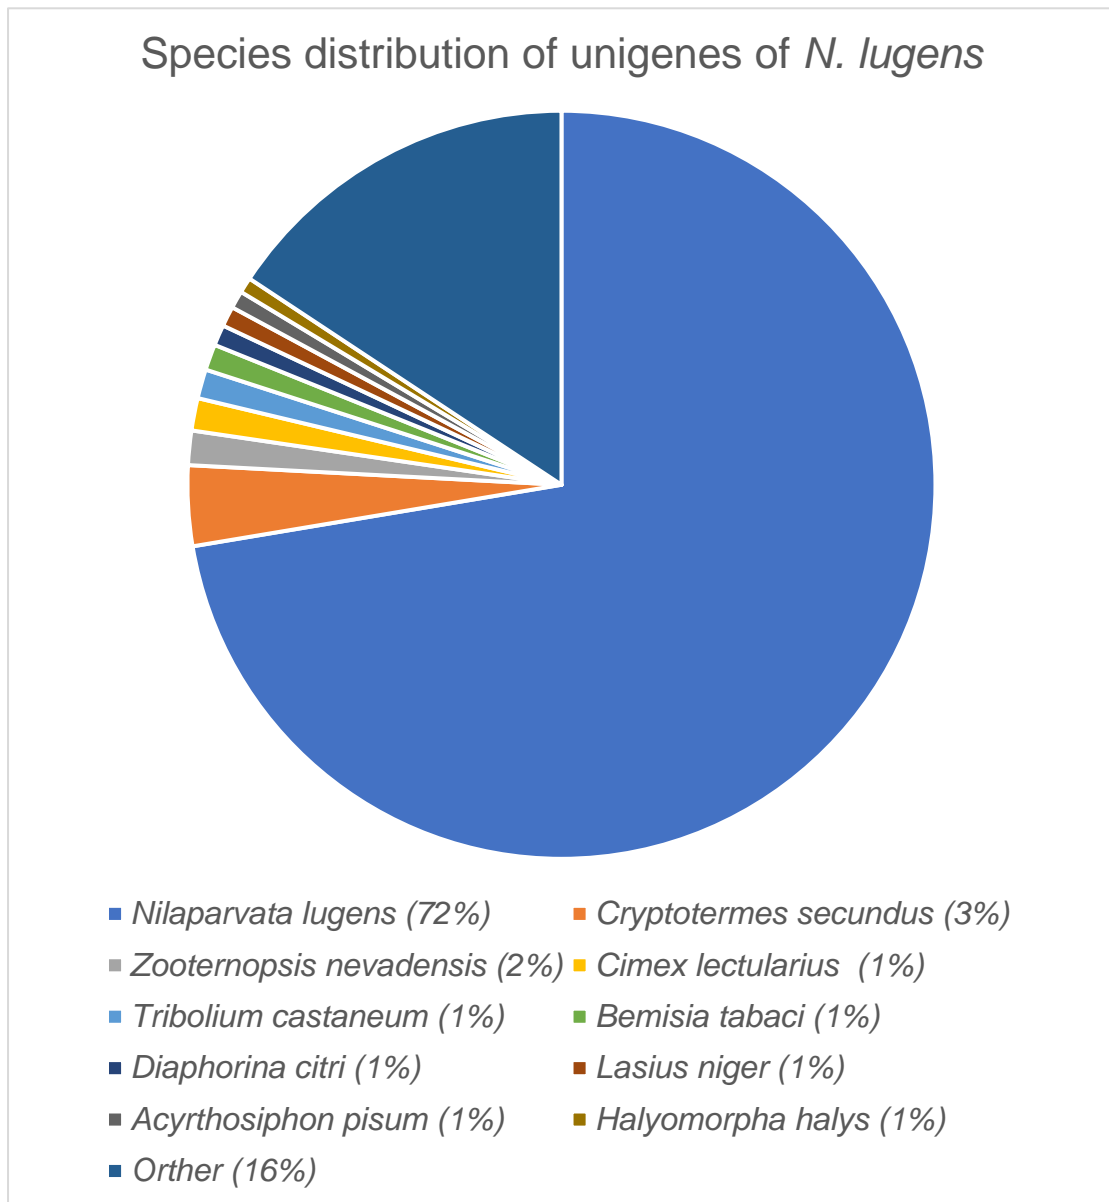

Supplementary Table 1. Primers used for RT-qPCR in this study.

| Gene ID | Primer directions | Primer sequences (5'-3') |
|---------|-------------------|--------------------------|
| NL06522 | Forward           | ACCACAACAACATTTCAGT      |
|         | Reverse           | AGTCCACAGTCTACCAAT       |
| NL04478 | Forward           | ATTCTTCCATTACTGCTGTT     |
|         | Reverse           | AGTTGGTAGACTGTTCAC       |
| NL04479 | Forward           | TAGTTGCCTCTGTAATGG       |
|         | Reverse           | CCTTCTTGCCTCTGATTA       |
| NL12129 | Forward           | AATCCACCATCAAGACATT      |
|         | Reverse           | CCACTATCGCTTCATACC       |
| NL19964 | Forward           | CGCTGGAAGTCTCATTAG       |
|         | Reverse           | TTGTTATTGGTATCGCTGTA     |
| NL10583 | Forward           | CAATGGAAGTGGAAGTGG       |
|         | Reverse           | CACGCATCATCTGGTAAG       |
| NL07859 | Forward           | AGTCGCTGTCTTCCTATTG      |
|         | Reverse           | GTCATACCAACGCTCCTT       |
| NL07683 | Forward           | ATGGAAGATGTTGATGATGAT    |
|         | Reverse           | AAGAGAAGCACCTGAGAA       |
| NL12812 | Forward           | CTTACGGTATCCCTCTCAATA    |
|         | Reverse           | CTTCCTGGAGTATTACAATTCT   |
| NL08143 | Forward           | TGGCAAGAATCCTCAAGA       |
|         | Reverse           | ACAGAGACGGAGTTATCG       |
| NL02505 | Forward           | GTGAATGATGATGTAGAATGG    |
|         | Reverse           | TAAGAGGAGTGTGAGTGA       |
| NL03739 | Forward           | AAGACCGTATCATCAAGT       |
|         | Reverse           | TACTGTATTGTTCCCTTACCT    |
| NL16431 | Forward           | ACTCTATCCACCTCTACC       |
|         | Reverse           | TCACTTCCATTCATCTTCA      |
| NL05339 | Forward           | CGCTCTCAACAACAATGG       |

|          |         |                         |
|----------|---------|-------------------------|
|          | Reverse | CAACCGCTACTAACAACAT     |
| NL47534  | Forward | TTCTGTCATCGGTCACTA      |
|          | Reverse | TTGCGGTCATTGTCATAA      |
| NL12570  | Forward | GTAGAGTTGAGGAGTAGGATA   |
|          | Reverse | GCTATACCGATGTTATGGAA    |
| NL20318  | Forward | CCGACATTAGCACTGATA      |
|          | Reverse | TACCAAACATTCCAAGATTT    |
| NL10434  | Forward | ACAGATTAGGTTCACTTCAA    |
|          | Reverse | CATTCTACACTGCGTTCT      |
| NL25071  | Forward | GAATGTCCGATTGTAGATGAA   |
|          | Reverse | TGGCTGATATTATGGTGAGA    |
| NL54218  | Forward | GGTCTTGTATGGTCTTCA      |
|          | Reverse | CAGTTTCTTCTTTAGTTTATCAG |
| 18S rRNA | Forward | CGCTA CTACCGATTGAA      |
|          | Reverse | GGAAA CCTTGTTACGACTT    |

---

Supplementary Table 2. Output statistics of *N. lugens* after challenge with *M. anisopliae*

| Samples | Mapped Reads           | Uniq Mapped Reads      | Multiple Map Reads     | Reads Map to '+'       | Reads Map to '-'       |
|---------|------------------------|------------------------|------------------------|------------------------|------------------------|
| T4-1    | 32,468,737<br>(75.34%) | 26,058,440<br>(60.47%) | 6,410,297<br>(14.88%)  | 13,807,628<br>(32.04%) | 13,873,397<br>(32.19%) |
| T4-2    | 33,800,347<br>(75.07%) | 25,106,153<br>(55.76%) | 8,694,194<br>(19.31%)  | 13,346,344<br>(29.64%) | 13,433,760<br>(29.84%) |
| T4-3    | 37,109,410<br>(76.84%) | 30,073,398<br>(62.27%) | 7,036,012<br>(14.57%)  | 15,925,291<br>(32.97%) | 15,999,162<br>(33.13%) |
| T8-1    | 58,583,658<br>(75.58%) | 46,491,797<br>(59.98%) | 12,091,861<br>(15.60%) | 24,754,488<br>(31.94%) | 24,819,683<br>(32.02%) |
| T8-2    | 35,099,897<br>(73.12%) | 28,359,521<br>(59.08%) | 6,740,376<br>(14.04%)  | 15,029,378<br>(31.31%) | 15,223,391<br>(31.71%) |
| T8-3    | 34,292,855<br>(77.51%) | 27,034,592<br>(61.10%) | 7,258,263<br>(16.40%)  | 14,365,221<br>(32.47%) | 14,411,949<br>(32.57%) |
| T16-1   | 36,327,142<br>(77.13%) | 29,636,425<br>(62.93%) | 6,690,717<br>(14.21%)  | 15,736,225<br>(33.41%) | 15,929,448<br>(33.82%) |
| T16-2   | 34,110,482<br>(77.28%) | 27,116,685<br>(61.43%) | 6,993,797<br>(15.84%)  | 14,335,632<br>(32.48%) | 14,475,811<br>(32.80%) |
| T16-3   | 33,215,067<br>(74.68%) | 27,477,148<br>(61.77%) | 5,737,919<br>(12.90%)  | 14,493,887<br>(32.59%) | 14,610,131<br>(32.85%) |
| T24-1   | 37,265,496<br>(74.03%) | 30,275,178<br>(60.14%) | 6,990,318<br>(13.89%)  | 16,128,627<br>(32.04%) | 16,194,401<br>(32.17%) |
| T24-2   | 40,065,113<br>(75.50%) | 32,279,891<br>(60.83%) | 7,785,222<br>(14.67%)  | 16,995,605<br>(32.03%) | 17,091,684<br>(32.21%) |
| T24-3   | 33,873,017<br>(75.81%) | 27,050,146<br>(60.54%) | 6,822,871<br>(15.27%)  | 14,335,642<br>(32.08%) | 14,392,362<br>(32.21%) |
| W4-1    | 38,239,390<br>(78.38%) | 31,253,974<br>(64.07%) | 6,985,416<br>(14.32%)  | 16,628,246<br>(34.09%) | 16,820,729<br>(34.48%) |

|       |                        |                        |                       |                        |                        |
|-------|------------------------|------------------------|-----------------------|------------------------|------------------------|
| W4-2  | 39,586,193<br>(78.02%) | 32,391,994<br>(63.84%) | 7,194,199<br>(14.18%) | 17,213,210<br>(33.93%) | 17,353,211<br>(34.20%) |
| W4-3  | 34,595,028<br>(73.34%) | 27,988,722<br>(59.34%) | 6,606,306<br>(14.01%) | 14,873,238<br>(31.53%) | 14,934,512<br>(31.66%) |
| W8-1  | 31,830,944<br>(73.33%) | 25,964,100<br>(59.81%) | 5,866,844<br>(13.52%) | 13,665,560<br>(31.48%) | 13,796,047<br>(31.78%) |
| W8-2  | 42,192,811<br>(76.09%) | 34,787,972<br>(62.74%) | 7,404,839<br>(13.35%) | 18,405,199<br>(33.19%) | 18,512,792<br>(33.39%) |
| W8-3  | 47,641,097<br>(75.87%) | 38,429,680<br>(61.20%) | 9,211,417<br>(14.67%) | 20,277,649<br>(32.29%) | 20,509,346<br>(32.66%) |
| W16-1 | 32,438,023<br>(75.73%) | 25,916,225<br>(60.50%) | 6,521,798<br>(15.23%) | 13,636,627<br>(31.84%) | 13,760,969<br>(32.13%) |
| W16-2 | 37,443,588<br>(77.30%) | 29,146,875<br>(60.17%) | 8,296,713<br>(17.13%) | 15,539,646<br>(32.08%) | 15,629,584<br>(32.27%) |
| W16-3 | 28,926,110<br>(69.19%) | 21,986,361<br>(52.59%) | 6,939,749<br>(16.60%) | 11,693,772<br>(27.97%) | 11,716,569<br>(28.03%) |
| W24-1 | 35,445,871<br>(77.37%) | 28,607,912<br>(62.45%) | 6,837,959<br>(14.93%) | 15,282,539<br>(33.36%) | 15,323,744<br>(33.45%) |
| W24-2 | 35,032,367<br>(75.34%) | 27,004,925<br>(58.08%) | 8,027,442<br>(17.26%) | 14,363,216<br>(30.89%) | 14,479,585<br>(31.14%) |
| W24-3 | 31,708,845<br>(76.86%) | 25,780,849<br>(62.49%) | 5,927,996<br>(14.37%) | 13,657,266<br>(33.10%) | 13,770,704<br>(33.38%) |

T, *M. anisopliae* treatment group; W, control group.

Table 3. Top twenty up- and down-regulated DEGs in *N. lugens* after *M. anisopliae* challenge.

| Treatment           | Gene ID  | P-value  | Fold Change (log2) | Up/Down regulated                                      | Description                            |
|---------------------|----------|----------|--------------------|--------------------------------------------------------|----------------------------------------|
| 4 h after infection | NL40807  | 5.66E-37 | 5.46               | up                                                     | Vitellogenin                           |
|                     | NL21487  | 7.77E-16 | 3.68               | up                                                     | N/A                                    |
|                     | NL58425  | 2.15E-13 | 3.42               | up                                                     | ribosomal protein L3e, partial         |
|                     | NL35745  | 4.40E-09 | 2.75               | up                                                     | N/A                                    |
|                     | NL49799  | 6.58E-07 | 2.34               | up                                                     | N/A                                    |
|                     | NL08709  | 1.33E-06 | 2.20               | up                                                     | Protein RNA-directed DNA methylation 3 |
|                     | NL06618  | 1.08E-05 | 2.07               | up                                                     | N/A                                    |
|                     | NL19138  | 1.46E-05 | 2.03               | up                                                     | N/A                                    |
|                     | NL19544  | 7.70E-06 | 1.99               | up                                                     | 60S ribosomal protein L23              |
|                     | NL06292  | 2.18E-05 | 1.96               | up                                                     | BTB/POZ domain-containing protein 6    |
|                     | NL15475  | 5.24E-05 | 1.88               | up                                                     | Vitellogenin                           |
|                     | NL16349  | 1.85E-06 | 1.82               | up                                                     | Homeobox protein extradenticle         |
|                     | NL56313  | 3.38E-06 | 1.81               | up                                                     | Helicase                               |
|                     | NL49607  | 1.10E-06 | 1.77               | up                                                     | Putative protein TPRXL                 |
|                     | NL03102  | 1.76E-04 | 1.76               | up                                                     | Protein Wnt-16                         |
|                     | NL01832  | 4.70E-04 | 1.64               | up                                                     | Vitellogenin                           |
|                     | NL20837  | 4.63E-04 | 1.62               | up                                                     | Crustapain                             |
|                     | NL18677  | 2.52E-04 | 1.59               | up                                                     | N/A                                    |
|                     | NL05842  | 9.35E-04 | 1.55               | up                                                     | N/A                                    |
|                     | NL41498  | 7.33E-04 | 1.54               | up                                                     | Sporozoite surface protein 2           |
| NL39423             | 4.88E-27 | -4.59    | down               | N/A                                                    |                                        |
| NL11553             | 2.08E-18 | -3.73    | down               | Nose resistant to fluoxetine protein 6                 |                                        |
| NL49423             | 3.11E-11 | -3.10    | down               | N/A                                                    |                                        |
| NL09618             | 4.62E-15 | -2.80    | down               | WW domain-containing transcription regulator protein 1 |                                        |
| NL17550             | 3.12E-09 | -2.55    | down               | Cuticle protein 16.5                                   |                                        |

|                     |         |          |       |      |                                        |
|---------------------|---------|----------|-------|------|----------------------------------------|
|                     | NL02377 | 8.72E-08 | -2.51 | down | N/A                                    |
|                     | NL14111 | 4.11E-11 | -2.47 | down | FTZ-F1, partial                        |
|                     | NL14580 | 3.88E-12 | -2.35 | down | N/A                                    |
|                     | NL06250 | 6.98E-07 | -2.33 | down | N/A                                    |
|                     | NL20969 | 3.40E-07 | -2.31 | down | N/A                                    |
|                     | NL20264 | 1.19E-06 | -2.28 | down | Odorant binding protein 3, partial     |
|                     | NL01794 | 6.63E-09 | -2.27 | down | Nose resistant to fluoxetine protein 6 |
|                     | NL10544 | 2.86E-07 | -2.20 | down | Cytochrome P450 18a1                   |
|                     | NL01946 | 4.27E-06 | -2.16 | down | Organic cation transporter protein     |
|                     | NL18057 | 6.21E-06 | -2.13 | down | Ejaculatory bulb-specific protein 3    |
|                     | NL11774 | 8.57E-06 | -2.09 | down | N/A                                    |
|                     | NL33463 | 4.37E-06 | -2.09 | down | N/A                                    |
|                     | NL07046 | 7.37E-06 | -2.08 | down | Cuticle protein 7                      |
|                     | NL06902 | 4.96E-06 | -2.08 | down | N/A                                    |
|                     | NL13997 | 1.01E-05 | -2.07 | down | N/A                                    |
| 8 h after infection | NL07487 | 9.51E-37 | 7.04  | up   | Protein takeout                        |
|                     | NL07486 | 1.74E-40 | 6.91  | up   | Protein takeout                        |
|                     | NL07483 | 2.13E-24 | 5.99  | up   | Protein takeout                        |
|                     | NL31812 | 4.65E-21 | 5.53  | up   | Hypothetical protein RP20              |
|                     | NL01946 | 1.47E-17 | 5.14  | up   | Organic cation transporter protein     |
|                     | NL10607 | 1.22E-19 | 4.99  | up   | Cytochrome P450 4C1                    |
|                     | NL06225 | 3.08E-33 | 4.98  | up   | N/A                                    |
|                     | NL05288 | 1.78E-14 | 4.94  | up   | N/A                                    |
|                     | NL08289 | 4.21E-14 | 4.81  | up   | Protein takeout                        |
|                     | NL02377 | 1.76E-15 | 4.80  | up   | N/A                                    |
|                     | NL07046 | 2.91E-13 | 4.73  | up   | Cuticle protein 7                      |
|                     | NL07554 | 3.70E-36 | 4.69  | up   | Pancreatic lipase-related protein 2    |
|                     | NL07254 | 3.99E-25 | 4.67  | up   | Cysteine sulfinic acid decarboxylase   |
|                     | NL16580 | 8.14E-13 | 4.63  | up   | N/A                                    |
|                     | NL03036 | 4.48E-15 | 4.57  | up   | Cytochrome P450 4c3                    |

|                      |         |          |       |      |                                                        |
|----------------------|---------|----------|-------|------|--------------------------------------------------------|
|                      | NL10849 | 2.94E-14 | 4.57  | up   | Nose resistant to fluoxetine protein 6                 |
|                      | NL11552 | 1.10E-16 | 4.30  | up   | Nose resistant to fluoxetine protein 6-like isoform X1 |
|                      | NL09541 | 2.73E-34 | 4.25  | up   | UMP-CMP kinase                                         |
|                      | NL07264 | 2.34E-13 | 4.24  | up   | La-related protein 6                                   |
|                      | NL08760 | 3.36E-14 | 4.23  | up   | Cuticle protein 6                                      |
|                      | NL15029 | 6.15E-26 | -6.24 | down | Adenylate kinase 7                                     |
|                      | NL20821 | 1.18E-26 | -5.64 | down | N/A                                                    |
|                      | NL02642 | 8.80E-17 | -5.27 | down | N/A                                                    |
|                      | NL01356 | 6.10E-13 | -4.52 | down | Aftiphilin                                             |
|                      | NL19169 | 1.09E-10 | -4.18 | down | N/A                                                    |
|                      | NL19699 | 1.26E-07 | -3.32 | down | N/A                                                    |
|                      | NL14009 | 4.76E-08 | -3.20 | down | N/A                                                    |
|                      | NL16876 | 2.51E-14 | -3.15 | down | Cytochrome P450 4g15                                   |
|                      | NL11634 | 1.06E-06 | -3.13 | down | N/A                                                    |
|                      | NL20837 | 6.38E-07 | -3.10 | down | Crustapain                                             |
|                      | NL19778 | 9.49E-10 | -2.90 | down | Cytochrome P450 4g15-like, partial                     |
|                      | NL07467 | 2.65E-06 | -2.87 | down | N/A                                                    |
|                      | NL05753 | 2.01E-05 | -2.79 | down | Trypsin-1                                              |
|                      | NL15475 | 2.39E-05 | -2.78 | down | Vitellogenin                                           |
|                      | NL00708 | 2.18E-11 | -2.74 | down | Esterase E4                                            |
|                      | NL20598 | 9.96E-08 | -2.71 | down | N/A                                                    |
|                      | NL14010 | 3.35E-09 | -2.68 | down | Neuropeptide-like protein 31                           |
|                      | NL10970 | 3.61E-11 | -2.68 | down | Fatty acid synthase                                    |
|                      | NL50364 | 5.96E-05 | -2.67 | down | N/A                                                    |
|                      | NL02647 | 5.83E-05 | -2.66 | down | Serine protease easter                                 |
| 16 h after infection | NL16850 | 5.48E-30 | 7.31  | up   | Serine/threonine-protein kinase kinX                   |
|                      | NL43859 | 3.10E-19 | 5.65  | up   | N/A                                                    |
|                      | NL20645 | 4.79E-16 | 4.36  | up   | Mitochondrial ornithine transporter 1-like, partial    |
|                      | NL20116 | 5.14E-09 | 3.89  | up   | N/A                                                    |



|         |          |       |      |                                                   |
|---------|----------|-------|------|---------------------------------------------------|
| NL04506 | 1.70E-18 | 3.79  | up   | E3 ubiquitin-protein ligase RNF139                |
| NL07467 | 1.71E-17 | 3.35  | up   | N/A                                               |
| NL18745 | 3.12E-06 | 3.25  | up   | N/A                                               |
| NL10891 | 7.98E-06 | 3.18  | up   | DnaJ homolog subfamily B member 13                |
| NL08061 | 9.78E-07 | 3.06  | up   | Chymotrypsin-like protease CTRL                   |
| NL09626 | 1.25E-05 | 2.91  | up   | ATP-dependent RNA helicase DBP2-like, partial     |
| NL14570 | 8.79E-10 | 2.89  | up   | Apolipoprotein D-like                             |
| NL20503 | 4.77E-09 | 2.71  | up   | Delta-like protein 1                              |
| NL11123 | 6.02E-08 | 2.68  | up   | Putative serine protease K12H4.7                  |
| NL10997 | 2.65E-04 | 2.67  | up   | Seminal fluid protein                             |
| NL03011 | 1.42E-08 | 2.65  | up   | Gamma-aminobutyric acid type B receptor subunit 2 |
| NL14287 | 1.51E-05 | 2.65  | up   | Troponin C, isotype gamma                         |
| NL14645 | 3.89E-04 | 2.60  | up   | N/A                                               |
| NL01957 | 1.10E-09 | 2.54  | up   | N/A                                               |
| NL01389 | 1.62E-06 | 2.54  | up   | N/A                                               |
| NL15414 | 2.25E-04 | 2.53  | up   | Putative serine protease K12H4.7                  |
| NL10213 | 2.96E-55 | -6.88 | down | N/A                                               |
| NL20037 | 1.09E-31 | -6.52 | down | Inactive pancreatic lipase-related protein 1      |
| NL20521 | 1.79E-25 | -6.28 | down | Exported protein (PHISTc), partial                |
| NL17474 | 1.38E-14 | -5.15 | down | Putative phospholipase B-like 2                   |
| NL15044 | 5.59E-21 | -4.84 | down | Ubiquitin-40S ribosomal protein S27a              |
| NL05659 | 3.86E-12 | -4.62 | down | N/A                                               |
| NL11385 | 9.34E-11 | -3.96 | down | N/A                                               |
| NL04821 | 3.50E-13 | -3.55 | down | Zinc finger protein 555                           |
| NL17823 | 6.16E-11 | -3.43 | down | Inactive pancreatic lipase-related protein 1      |
| NL18162 | 1.30E-07 | -3.24 | down | Protein sine oculis-like, partial                 |

|                      |         |          |       |      |                                                         |
|----------------------|---------|----------|-------|------|---------------------------------------------------------|
|                      | NL15422 | 2.19E-06 | -2.82 | down | Cyclin-dependent kinase 17                              |
|                      | NL17237 | 2.07E-05 | -2.75 | down | Muscle M-line assembly protein unc-89 isoform X5        |
|                      | NL55478 | 2.69E-04 | -2.61 | down | Vacuole membrane protein 1-like, partial                |
|                      | NL07385 | 7.29E-06 | -2.58 | down | N/A                                                     |
|                      | NL26851 | 5.75E-06 | -2.57 | down | N/A                                                     |
|                      | NL43998 | 1.66E-06 | -2.55 | down | Retrovirus-related Pol polyprotein from transposon 17.6 |
|                      | NL45097 | 1.68E-04 | -2.46 | down | N/A                                                     |
|                      | NL15191 | 5.84E-08 | -2.43 | down | N/A                                                     |
|                      | NL20243 | 3.47E-05 | -2.38 | down | Kinase suppressor of Ras 2-like, partial                |
|                      | NL07814 | 9.26E-04 | -2.35 | down | N/A                                                     |
| 24 h after infection | NL54282 | 7.29E-43 | 7.22  | up   | Leukocyte receptor cluster member 8 homolog             |
|                      | NL03938 | 1.26E-30 | 5.95  | up   | Kelch-like protein 5                                    |
|                      | NL09021 | 4.01E-18 | 5.08  | up   | Protein winged eye                                      |
|                      | NL16431 | 4.85E-66 | 4.56  | up   | Probable splicing factor, arginine/serine-rich 7        |
|                      | NL03033 | 3.75E-08 | 3.25  | up   | N/A                                                     |
|                      | NL15752 | 4.03E-08 | 2.71  | up   | N/A                                                     |
|                      | NL19253 | 5.10E-11 | 2.62  | up   | UPF0598 protein                                         |
|                      | NL48724 | 1.02E-08 | 2.53  | up   | Hypothetical protein BSL78_14642                        |
|                      | NL17447 | 8.65E-06 | 2.40  | up   | Inactive pancreatic lipase-related protein 1            |
|                      | NL01160 | 7.08E-05 | 2.35  | up   | N/A                                                     |
|                      | NL07050 | 1.94E-63 | 2.34  | up   | N/A                                                     |
|                      | NL16631 | 8.50E-07 | 2.29  | up   | N/A                                                     |
|                      | NL10434 | 5.63E-07 | 2.21  | up   | BTB/POZ domain-containing protein 3                     |
|                      | NL16630 | 5.99E-08 | 2.19  | up   | L-2-aminoadipate reductase large subunit                |
|                      | NL03439 | 3.44E-06 | 2.15  | up   | Zinc finger protein 77                                  |
|                      | NL01501 | 4.97E-04 | 2.15  | up   | N/A                                                     |

|         |          |       |      |                                                             |
|---------|----------|-------|------|-------------------------------------------------------------|
| NL01841 | 6.48E-04 | 2.14  | up   | Lipoma HMGIC fusion partner                                 |
| NL03625 | 4.92E-04 | 2.14  | up   | N/A                                                         |
| NL01921 | 2.09E-05 | 2.14  | up   | Sodium channel protein Nach                                 |
| NL08247 | 4.99E-04 | 2.13  | up   | Lysosomal alpha-mannosidase                                 |
| NL15662 | 3.84E-38 | -6.62 | down | Bromo adjacent homology domain-containing 1 protein         |
| NL30575 | 1.04E-21 | -5.17 | down | Histone-lysine N-methyltransferase PRDM9                    |
| NL06659 | 7.47E-20 | -5.01 | down | Transcription factor SPT20 homolog, partial                 |
| NL32622 | 1.48E-17 | -4.84 | down | Protein CLP1 homolog isoform X1                             |
| NL04479 | 1.42E-31 | -4.74 | down | Defensin-like                                               |
| NL16751 | 7.88E-15 | -4.40 | down | Hypothetical protein ALC60                                  |
| NL19442 | 3.07E-11 | -3.60 | down | N/A                                                         |
| NL06681 | 6.30E-23 | -3.38 | down | Suppressor protein SRP40                                    |
| NL03520 | 4.66E-10 | -3.36 | down | N/A                                                         |
| NL38390 | 5.89E-07 | -3.00 | down | N/A                                                         |
| NL14687 | 5.72E-11 | -2.98 | down | N/A                                                         |
| NL10088 | 1.48E-07 | -2.96 | down | Protein cueball                                             |
| NL16364 | 1.94E-06 | -2.93 | down | Major facilitator superfamily domain-containing protein 6-A |
| NL08286 | 8.77E-08 | -2.92 | down | N/A                                                         |
| NL34455 | 2.18E-06 | -2.78 | down | N/A                                                         |
| NL10028 | 7.33E-07 | -2.78 | down | N/A                                                         |
| NL20829 | 4.50E-06 | -2.73 | down | N/A                                                         |
| NL09415 | 3.97E-06 | -2.71 | down | N/A                                                         |
| NL10248 | 4.56E-08 | -2.69 | down | N/A                                                         |
| NL09136 | 7.68E-65 | -2.63 | down | Roquin-1 isoform X1                                         |

---

N/A, No annotation.

Table 4. the information of other DEGs discussed in this study.

| Gene ID | <i>P</i> -value | Fold Change<br>(log <sub>2</sub> ) | Up/Down<br>regulated | Description            |
|---------|-----------------|------------------------------------|----------------------|------------------------|
| NL01845 | 8.43E-03        | -1.20E+00                          | down                 | Peroxidase             |
| NL07046 | 7.37E-06        | 2.08E+00                           | up                   | Insect cuticle protein |
| NL13168 | 1.65E-03        | 1.48E+00                           | up                   | Spaetzle               |
